# Supplementary material for: Admission Predictors of Mortality in Hospitalized COVID-19 Patients—A Serbian Cohort Study
Source: MDPI journal article supplement (doi:10.3390/jcm11206109), 2022-10-17
Supplement: s1 [file s1]

Supplementary Table S1. Threshold values for blood gas and laboratory parameters, according to the ROC analysis or laboratory reference lines.

| Parameter                        | Threshold Value                  | AUC (CI)                         | „p“ value |
|----------------------------------|----------------------------------|----------------------------------|-----------|
| SaO2 [%]                         | 88.5                             | 0.597 (0.549-0.645)              | < 0.001*  |
| PaO2 [kPa]                       | 6.75                             | 0.596 (0.547-0.644)              | < 0.001*  |
| Lymphocytes [10 <sup>9</sup> /L] | 1.2                              | <i>Laboratory reference line</i> |           |
| PLT [10 <sup>9</sup> /L]         | 135                              | <i>Laboratory reference line</i> |           |
| HGB [g/L]                        | Male:138<br>Female:120           | <i>Laboratory reference line</i> |           |
| ALT [IU/L]                       | 41                               | <i>Laboratory reference line</i> |           |
| BUN [mmol/L]                     | 7.75                             | 0.596 (0.550-0.642)              | < 0.001*  |
| Creatinin [mmol/L]               | Male: 107.5<br>Female: 86.5      | 0.603 (0.557-0.650)              | < 0.001*  |
| LDH [U/L]                        | 804.5                            | 0.593 (0.543-0.643)              | < 0.001*  |
| CKMB [U/L]                       | 25                               | <i>Laboratory reference line</i> |           |
| CK [U/L]                         | 171                              | <i>Laboratory reference line</i> |           |
| CRP [mg/L]                       | 107.5                            | 0.560 (0.513-0.608)              | 0.013*    |
| PCT [ng/mL]                      | 0.129                            | 0.597 (0.550-0.644)              | < 0.001*  |
| hsTnI                            | Males: 0.0342<br>Females: 0.0156 | <i>Laboratory reference line</i> |           |

|                    |      |                     |          |
|--------------------|------|---------------------|----------|
| NT pro-BNP [pg/mL] | 759  | 0.603 (0.556-0.649) | < 0.001* |
| IL-6 [pg/mL]       | 74.6 | 0.624 (0.577-0.671) | < 0.001* |

Abbreviations: ALT - alanine transaminase; AUC - area under the curve; BUN - blood urea nitrogen; CI - confidence interval; CK - creatine kinase; CKMB - muscle-brain form of creatine kinase; CRP - c reactive protein; HGB - hemoglobin; ; hsTnI - high sensitive troponin I; IL-6 - interleukin 6; LDH - lactate dehydrogenase; NPV - negative predictive value; PaO<sub>2</sub> - Partial pressure of oxygen; PCT - procalcitonin; PLT - platelets; PPV - positive predictive value; pro-BNP - a pro-form of brain natriuretic peptide; ROC - receiver operating characteristics curve; SaO<sub>2</sub> - oxygen saturation of blood; \* statistical significance level at < 0.5.
